# Supplementary material for: Synthesis of proton caged disulphide compounds for gold nanoparticle functionalization
Source: Royal Society of Chemistry journal article supplement (doi:10.1039/c4nj01362j), 2015-01-01
Supplement: c4nj01362j1.pdf [file c4nj01362j1.pdf]

### Supplementary Information

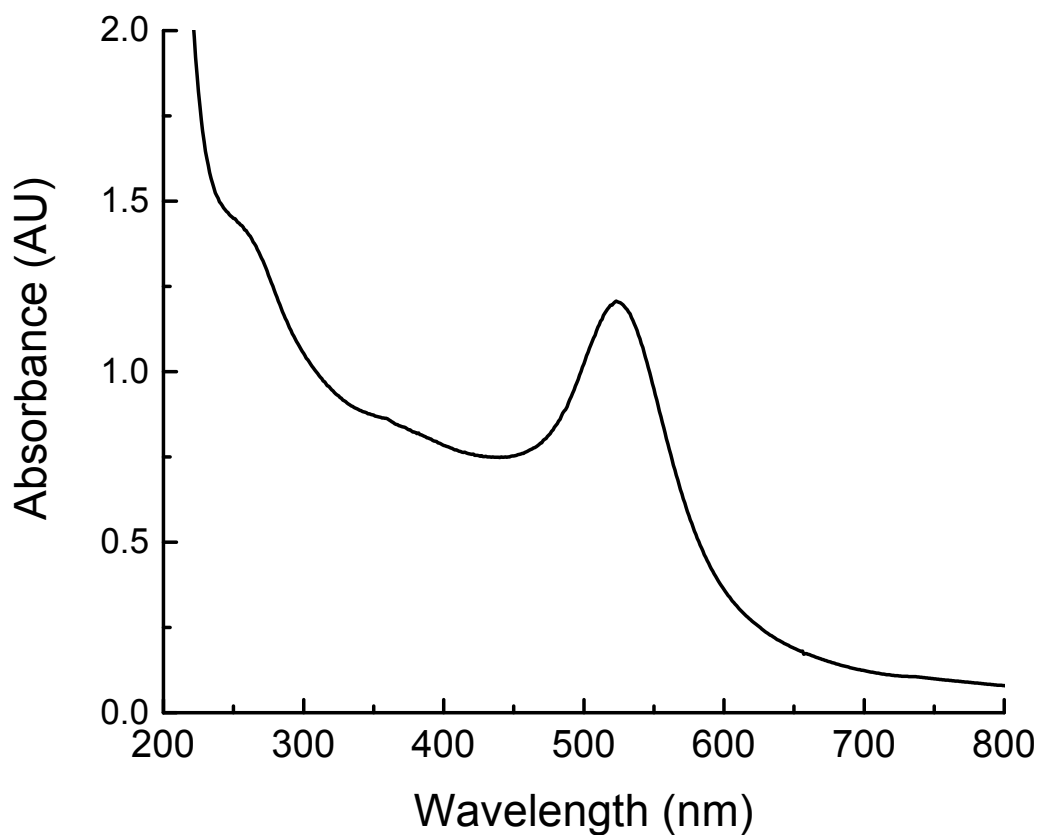

**Fig. 1S** Surface plasmon resonance spectrum of the citrate stabilized gold nanoparticles.

### Thermogravimetric Analysis

Au nanoparticle 98.10%; ligands (NE-SS-deca) 1.9%. TEM; average diameter (D) = 22 nm. The approximate number of gold atoms in a cluster;  $N_{Au} = (59 \text{ nm}^3)(\pi/6)D^3 = 328,774$ . (The density of bulk face-centered cubic (fcc) Au is 59 atoms/nm<sup>3</sup>). The approximate number of ligand per AuNP-1 is  $n=2969$  (Analysis performed with a TA-Instruments Q500 scale).

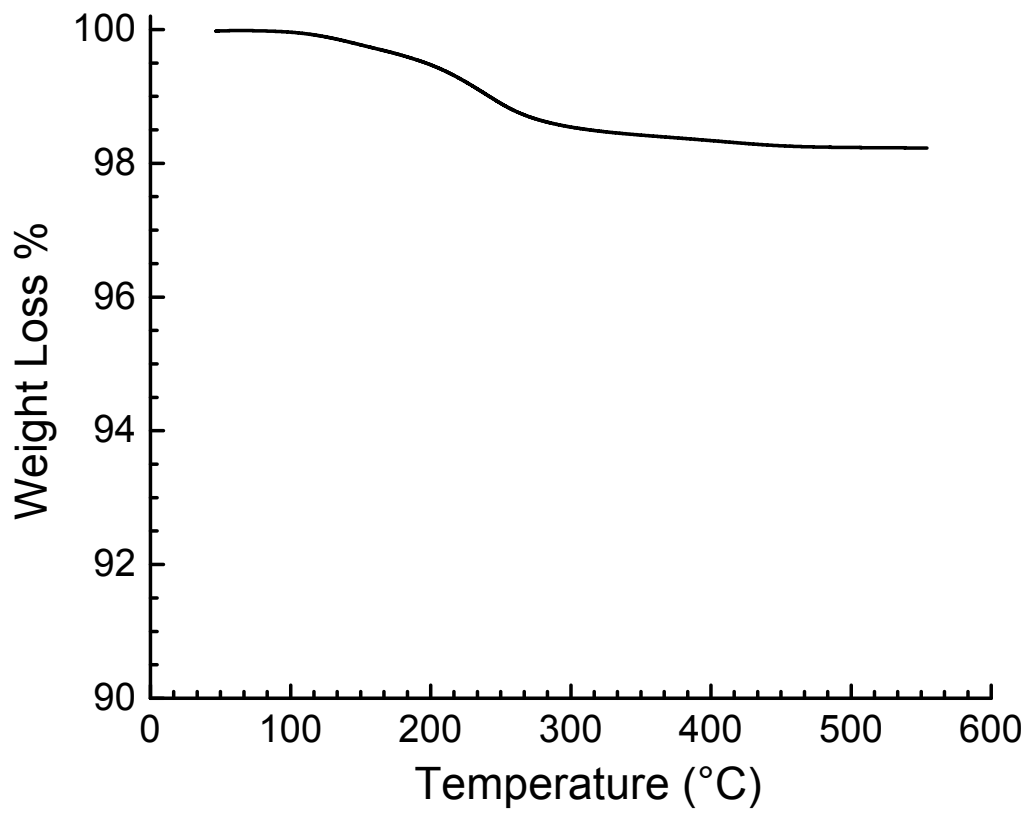

**Fig. 2S** TGA Data of the NESS-deca/AuNPs sample.
